# Supplementary material
Source: Research Square preprint supplement (doi:10.21203/rs.3.rs-9452754/v1)
Supplement: Supplementary file 1 [file c811844f987dcf9016e3f83f.docx]

**AWARENESS OF BREAST CANCER SELF-EXAMINATION AND THE ROLE OF SOCIAL MEDIA IN INFORMATION DISSEMINATION AMONG WOMEN IN ABEOKUTA**

Thank you for taking the time to participate in this research survey, “Awareness of Breast Cancer Self-Examination and the Role of Social Media in Information Dissemination Among Women in Abeokuta.” This study aims to explore women’s knowledge and practices regarding breast self-examination (BSE) and how social media contributes to promoting awareness.

Your honest responses will help identify gaps in awareness and improve the use of social media as a tool for spreading important health information. Participation is voluntary, and all information you provide will be kept strictly confidential.

**Section A: Socio-Demographic Characteristics**

1. **Age (years):**
   ☐ 20–24 ☐ 25–29 ☐ 30–34 ☐ 35–39 ☐ 40–44 ☐ 45–49 ☐ 50–54 ☐ 55–59 ☐ 60 and above
2. **Highest Level of Education:**
   ☐ No formal education ☐ Primary ☐ Secondary ☐ University/Polytechnic
3. **Occupation:**
   ☐ Civil servant ☐ Private sector ☐ Farmer ☐ Trader ☐ Others: ______
4. **Location:**
   ☐ Resident of Abeokuta ☐ Non-resident

**Section B: Knowledge and Awareness of Breast Cancer and BSE**

1. Have you ever heard of breast cancer?
   ☐ Yes ☐ No
2. Do you think breast cancer is a serious disease?
   ☐ Yes ☐ No ☐ Not sure
3. Have you ever heard of Breast Self-Examination (BSE)?
   ☐ Yes ☐ No
4. Do you know how to perform BSE correctly?
   ☐ Yes ☐ No
5. How often should BSE be performed?
   ☐ Monthly ☐ Weekly ☐ Yearly ☐ I don’t know

**Section C: Information Sources and Role of Social Media**

1. What was your first source of information about BSE?
   ☐ Social media ☐ Radio/TV ☐ Health workers ☐ Friends/family
2. Which social media platforms do you commonly use? *(Tick all that apply)*
   ☐ WhatsApp ☐ Facebook ☐ Instagram ☐ TikTok ☐ X (Twitter) ☐ None
3. How often do you encounter breast cancer information on social media?
   ☐ Frequently ☐ Occasionally ☐ Rarely ☐ Never
4. Do you trust breast cancer information on social media?
   ☐ Yes, I trust it
   ☐ Only if from doctors/government/NGOs
   ☐ No, I don’t trust it
5. Social media increases my confidence in performing BSE:
   ☐ Strongly agree ☐ Agree ☐ Disagree ☐ Strongly disagree
6. What discourages you from following breast cancer information on social media?
   ☐ Fear of diagnosis
   ☐ Lack of money
   ☐ Information is confusing
   ☐ I don’t feel at risk
7. Do you think social media has increased awareness of breast cancer?
   ☐ Yes ☐ No

**Section D: Recommendations on Social Media Use**

1. Would you recommend the consistent use of social media for disseminating breast cancer awareness content?
   ☐ Yes ☐ No
2. How would you prefer to receive breast cancer information on social media?
   ☐ Short TikTok/Facebook reels
   ☐ Pictures and infographics
   ☐ Audio messages in local languages
   ☐ Live chats with medical practitioners/government/NGOs
3. Which format do you find most engaging for health information?
   ☐ Videos (reels)
   ☐ Infographics
   ☐ Audio messages
   ☐ Live sessions
4. Which platform should be prioritized for breast cancer awareness campaigns?
   ☐ WhatsApp
   ☐ Facebook
   ☐ Instagram
   ☐ TikTok
   ☐ X (Twitter)
